# Supplementary material for: Directionality of P⋯O pnicogen bonding in light of geometry corrected statistical analysis
Source: Royal Society of Chemistry journal article supplement (doi:10.1039/d0nj01683g), 2020-01-01
Supplement: d0nj01683g1.pdf [file d0nj01683g1.pdf]

## Supporting Information

### Directionality of P...O pnictogen bonding in light of geometry corrected statistical analysis

Arijit Saha, Ragima V. P. Veluthaparambath and Binoy K. Saha\*

#### Contents

**Table S1.** Data for  $X_3P\cdots O$  pnictogen bonding (X is any atom).

**Table S2.** Data for  $X_3P\cdots O$  pnictogen bonding for which X = oxygen in  $\angle OPX = 90 - 180^\circ$ .

**Table S3.** Data for  $X_3P\cdots O$  pnictogen bonding for which X = carbon in  $\angle OPX = 90 - 180^\circ$ .

**Table S4.** Data for  $X_3P\cdots O$  pnictogen bonding for which X = nitrogen in  $\angle OPX = 90 - 180^\circ$ .

**Table S5.** Data for  $X_4P\cdots O$  pnictogen bonding (X is any atom).

**Table S6.** Data for  $X_4P\cdots O$  pnictogen bonding for which X = oxygen in  $\angle OPX = 90 - 180^\circ$ .

**Table S7.** Data for  $X_4P\cdots O$  pnictogen bonding for which X = carbon in  $\angle OPX = 90 - 180^\circ$ .

**Table S1. Data for X<sub>3</sub>P...O pnictogen bonding (X is any atom).**

| Angle range | Sin $\theta$ | No of Hits Before Cone Correction (n) | % Of hits Before Cone Correction | No of Hits After Cone Correction = n/Sin $\theta$ | % Of hits After Cone Correction |
|-------------|--------------|---------------------------------------|----------------------------------|---------------------------------------------------|---------------------------------|
| 90-100      | 0.9962       | 28                                    | 10.33                            | 28                                                | 2.27                            |
| 100-110     | 0.9659       | 13                                    | 4.80                             | 13                                                | 1.05                            |
| 110-120     | 0.9063       | 16                                    | 5.90                             | 18                                                | 1.46                            |
| 120-130     | 0.8192       | 19                                    | 7.01                             | 23                                                | 1.86                            |
| 130-140     | 0.7071       | 07                                    | 2.58                             | 10                                                | 0.81                            |
| 140-150     | 0.5736       | 17                                    | 6.27                             | 30                                                | 2.43                            |
| 150-160     | 0.4226       | 29                                    | 10.70                            | 69                                                | 5.59                            |
| 160-170     | 0.2588       | 77                                    | 28.41                            | 298                                               | 24.15                           |
| 170-180     | 0.0872       | 65                                    | 23.99                            | 745                                               | 60.37                           |

**Table S2. Data for X<sub>3</sub>P...O pnictogen bonding for which X = oxygen in  $\angle OPX = 90 - 180^\circ$ .**

| Angle range | Sin $\theta$ | No of Hits Before Cone Correction (n) | % Of hits Before Cone Correction | No of Hits After Cone Correction = n/Sin $\theta$ | % Of hits After Cone Correction |
|-------------|--------------|---------------------------------------|----------------------------------|---------------------------------------------------|---------------------------------|
| 90-100      | 0.9962       | 05                                    | 10.42                            | 5                                                 | 1.96                            |
| 100-110     | 0.9659       | 00                                    | 0.00                             | 0                                                 | 0.00                            |
| 110-120     | 0.9063       | 02                                    | 4.17                             | 2                                                 | 0.86                            |
| 120-130     | 0.8192       | 03                                    | 6.25                             | 4                                                 | 1.43                            |
| 130-140     | 0.7071       | 01                                    | 2.08                             | 1                                                 | 0.55                            |
| 140-150     | 0.5736       | 02                                    | 4.17                             | 3                                                 | 1.36                            |
| 150-160     | 0.4226       | 06                                    | 12.50                            | 14                                                | 5.55                            |
| 160-170     | 0.2588       | 14                                    | 29.17                            | 54                                                | 21.13                           |
| 170-180     | 0.0872       | 15                                    | 31.25                            | 172                                               | 67.19                           |

**Table S3. Data for X<sub>3</sub>P...O pnictogen bonding for which X = carbon in  $\angle OPX = 90 - 180^\circ$ .**

| Angle range | Sin $\theta$ | No of Hits Before Cone Correction (n) | % Of hits Before Cone Correction | No of Hits After Cone Correction = n/Sin $\theta$ | % Of hits After Cone Correction |
|-------------|--------------|---------------------------------------|----------------------------------|---------------------------------------------------|---------------------------------|
| 90-100      | 0.9962       | 09                                    | 8.57                             | 9                                                 | 2.04                            |
| 100-110     | 0.9659       | 07                                    | 6.67                             | 7                                                 | 1.64                            |
| 110-120     | 0.9063       | 10                                    | 9.52                             | 11                                                | 2.49                            |
| 120-130     | 0.8192       | 09                                    | 8.57                             | 11                                                | 2.48                            |
| 130-140     | 0.7071       | 02                                    | 1.90                             | 3                                                 | 0.64                            |
| 140-150     | 0.5736       | 06                                    | 5.71                             | 10                                                | 2.36                            |
| 150-160     | 0.4226       | 10                                    | 9.52                             | 24                                                | 5.34                            |
| 160-170     | 0.2588       | 30                                    | 28.57                            | 116                                               | 26.17                           |
| 170-180     | 0.0872       | 22                                    | 20.95                            | 252                                               | 56.95                           |

**Table S4. Data for X<sub>3</sub>P...O pnictogen bonding for which X = nitrogen in ∠OPX = 90 – 180°.**

| Angle range | Sin θ  | No of Hits Before Cone Correction (n) | % Of hits Before Cone Correction | No of Hits After Cone Correction = n/Sin θ | % Of hits After Cone Correction |
|-------------|--------|---------------------------------------|----------------------------------|--------------------------------------------|---------------------------------|
| 90-100      | 0.9962 | 09                                    | 14.29                            | 9                                          | 3.06                            |
| 100-110     | 0.9659 | 04                                    | 6.35                             | 4                                          | 1.40                            |
| 110-120     | 0.9063 | 00                                    | 0.00                             | 0                                          | 0.00                            |
| 120-130     | 0.8192 | 02                                    | 3.17                             | 2                                          | 0.83                            |
| 130-140     | 0.7071 | 01                                    | 1.59                             | 1                                          | 0.48                            |
| 140-150     | 0.5736 | 02                                    | 3.17                             | 3                                          | 1.18                            |
| 150-160     | 0.4226 | 09                                    | 14.29                            | 21                                         | 7.22                            |
| 160-170     | 0.2588 | 21                                    | 33.33                            | 81                                         | 27.51                           |
| 170-180     | 0.0872 | 15                                    | 23.81                            | 172                                        | 58.31                           |

**Table S5. Data for X<sub>4</sub>P...O pnictogen bonding (X is any atom).**

| Angle range | Sin θ  | No of Hits Before Cone Correction (n) | % Of hits Before Cone Correction | No of Hits After Cone Correction = n/Sin θ | % Of hits After Cone Correction |
|-------------|--------|---------------------------------------|----------------------------------|--------------------------------------------|---------------------------------|
| 90-100      | 0.9962 | 55                                    | 14.51                            | 55                                         | 4.35                            |
| 100-110     | 0.9659 | 28                                    | 7.39                             | 29                                         | 2.29                            |
| 110-120     | 0.9063 | 20                                    | 5.28                             | 22                                         | 1.74                            |
| 120-130     | 0.8192 | 17                                    | 4.49                             | 21                                         | 1.64                            |
| 130-140     | 0.7071 | 25                                    | 6.60                             | 35                                         | 2.79                            |
| 140-150     | 0.5736 | 30                                    | 7.92                             | 52                                         | 4.12                            |
| 150-160     | 0.4226 | 77                                    | 20.32                            | 182                                        | 14.37                           |
| 160-170     | 0.2588 | 77                                    | 20.32                            | 298                                        | 23.46                           |
| 170-180     | 0.0872 | 50                                    | 13.19                            | 573                                        | 45.22                           |

**Table S6. Data for X<sub>4</sub>P...O pnictogen bonding for which X = oxygen in ∠OPX = 90 – 180°.**

| Angle range | Sin θ  | No of Hits Before Cone Correction (n) | % Of hits Before Cone Correction | No of Hits After Cone Correction = n/Sin θ | % Of hits After Cone Correction |
|-------------|--------|---------------------------------------|----------------------------------|--------------------------------------------|---------------------------------|
| 90-100      | 0.9962 | 34                                    | 14.66                            | 34                                         | 4.60                            |
| 100-110     | 0.9659 | 22                                    | 9.48                             | 23                                         | 3.07                            |
| 110-120     | 0.9063 | 13                                    | 5.60                             | 14                                         | 1.93                            |
| 120-130     | 0.8192 | 12                                    | 5.17                             | 15                                         | 1.97                            |
| 130-140     | 0.7071 | 17                                    | 7.33                             | 24                                         | 3.24                            |
| 140-150     | 0.5736 | 22                                    | 9.48                             | 38                                         | 5.17                            |
| 150-160     | 0.4226 | 45                                    | 19.40                            | 106                                        | 14.35                           |
| 160-170     | 0.2588 | 37                                    | 15.95                            | 143                                        | 19.27                           |
| 170-180     | 0.0872 | 30                                    | 12.93                            | 344                                        | 46.37                           |

**Table S7. Data for  $X_4P \cdots O$  pnictogen bonding for which  $X = \text{carbon}$  in  $\angle OPX = 90 - 180^\circ$ .**

| <b>Angle range</b> | <b>Sin <math>\theta</math></b> | <b>No of Hits Before Cone Correction (n)</b> | <b>% Of hits Before Cone Correction</b> | <b>No of Hits After Cone Correction = <math>n/\text{Sin } \theta</math></b> | <b>% Of hits After Cone Correction</b> |
|--------------------|--------------------------------|----------------------------------------------|-----------------------------------------|-----------------------------------------------------------------------------|----------------------------------------|
| 90-100             | 0.9962                         | 12                                           | 11.54                                   | 12                                                                          | 3.37                                   |
| 100-110            | 0.9659                         | 05                                           | 4.81                                    | 5                                                                           | 1.45                                   |
| 110-120            | 0.9063                         | 06                                           | 5.77                                    | 7                                                                           | 1.85                                   |
| 120-130            | 0.8192                         | 05                                           | 4.81                                    | 6                                                                           | 1.71                                   |
| 130-140            | 0.7071                         | 06                                           | 5.77                                    | 8                                                                           | 2.38                                   |
| 140-150            | 0.5736                         | 07                                           | 6.73                                    | 12                                                                          | 3.42                                   |
| 150-160            | 0.4226                         | 24                                           | 23.08                                   | 57                                                                          | 15.91                                  |
| 160-170            | 0.2588                         | 26                                           | 25.00                                   | 100                                                                         | 28.14                                  |
| 170-180            | 0.0872                         | 13                                           | 12.50                                   | 149                                                                         | 41.76                                  |
